# 1 Polygenic risk score of alcohol consumption 2 predicts alcohol-related morbidity and all- 3 cause mortality

4

5 *Tuomo Kiiskinen<sup>1</sup>, Nina J. Mars<sup>1</sup>, Teemu Palviainen<sup>1</sup>, Jukka Koskela<sup>1</sup>, Pietari Ripatti<sup>1</sup>, Joel T. Rämö<sup>1</sup>,*  
6 *Sanni Ruotsalainen<sup>1</sup>, FinnGen, GSCAN Consortium, Aarno Palotie<sup>1,2</sup>, Pamela A.F. Madden<sup>3</sup>, Richard*  
7 *J. Rose<sup>4</sup>, Jaakko Kaprio<sup>1,6</sup>, Veikko Salomaa<sup>5</sup>, Pia Mäkelä<sup>5</sup>, Aki S. Havulinna<sup>1,5</sup>, Samuli Ripatti<sup>1,2,6</sup>*

8

## 9 **Author affiliations**

10 <sup>1</sup>Institute for Molecular Medicine Finland (FIMM), HiLIFE, University of Helsinki, Helsinki, Finland

11 <sup>2</sup>The Broad Institute of MIT and Harvard, Cambridge, Massachusetts, USA

12 <sup>3</sup>Department of Psychiatry, Washington University School of Medicine in St.Louis, St.Louis,

13 Missouri, USA

14 <sup>4</sup>Department of Psychological and Brain Sciences, Indiana University Bloomington, Bloomington,

15 Indiana, USA

16 <sup>5</sup>National Institute for Health and Welfare, Helsinki, Finland

17 <sup>6</sup>Department of Public Health, Clinicum, Faculty of Medicine, University of Helsinki, Helsinki,

18 Finland

19 **Corresponding author:** *Samuli Ripatti*

20 **Email:** *samuli.ripatti@helsinki.fi*

21

22

23

## 24 Abstract

25

26 **Objective:** To develop a highly polygenic risk score (PRS) for alcohol consumption and study whether  
27 it predicts alcohol-related morbidity and all-cause mortality.

28

29 **Design:** Biobank-based prospective cohort study

30

31 **Setting:** FinnGen Study (Finland)

32

33 **Participants:** 96,499 genotyped participants from the nationwide prospective FinnGen study and  
34 36,499 participants from prospective cohorts (Health 2000, FINRISK, Twin Cohort) with detailed  
35 baseline data and up to 25 years of follow-up time.

36

37 **Main outcome measures:** Incident alcohol-related morbidity and alcohol-related or all-cause  
38 mortality, based on hospitalizations, outpatient specialist care, drug purchases, and death reports.

39

40 **Results:** In 96,499 FinnGen participants there were in total 4,785 first-observed incident alcohol-  
41 related health events. The PRS of alcohol consumption was associated with alcohol-related  
42 morbidity and the risk estimate (hazard ratio, HR) between the highest and lowest quintiles of the  
43 PRS was 1.67 [ 95 % confidence interval: 1.52-1.84],  $p=3.2*10^{-27}$ ). In 28,639 participants with  
44 comprehensive baseline data from prospective Health 2000 and FINRISK cohorts, 911 incident first  
45 alcohol-related events were observed. When adjusted for self-reported alcohol consumption,  
46 education, marital status, and gamma-glutamyl transferase blood levels, the risk estimate between  
47 the highest and lowest quintiles of the PRS was 1.58 (CI=[1.26-1.99],  $p=8.2*10^{-5}$ ). The PRS was also  
48 associated with all-cause mortality with a risk estimate of 1.33 between the highest and lowest  
49 quintiles (CI=[1.2-1.47],  $p=4.5e-08$ ) in the adjusted model. In all 39,695 participants with self-  
50 reported alcohol consumption available, a 1 SD increase in the PRS was associated with 11.2 g (=0.93  
51 drinks) higher weekly alcohol consumption ( $\beta=11.2$  [9.85-12.58 g],  $p = 2.3*10^{-58}$ ).

52

53 **Conclusions:** The PRS for alcohol consumption associates for both alcohol-related morbidity and all-  
54 cause mortality. These findings underline the importance of heritable factors in alcohol-related  
55 behavior and the related health burden. The results highlight how measured genetic risk for an  
56 important behavioral risk factor can be used to predict related health outcomes.

57

58

59

60

## 61 Introduction

62

63 Alcohol drinking is a major dose-dependent contributor to morbidity and mortality. Globally, 3  
64 million annual deaths (5 % of all deaths) result from alcohol consumption, and is also linked to more  
65 than 200 disease and injury outcomes.(1) As ethanol is a psychoactive substance with addictive  
66 properties,(2) alcohol consumption can lead to the development of alcohol use disorders (AUDs),  
67 globally prevalent mental disorders of pathological addictive or abusive drinking patterns, which are  
68 linked to worse health outcomes, negative socioeconomic effects, and increased mortality.(3) There  
69 is a strong connection between the health burden and the level of alcohol consumed, (4) and in  
70 total alcohol has been estimated to be the most damaging of all substances of abuse, in terms of  
71 harm caused to self and others.(5)

72

73 Alcohol-related behaviors are also affected by genetic factors and the estimated heritability of  
74 alcohol consumption in twin studies has ranged between 35% and 65% (weighted average 37%) (6)  
75 and its single nucleotide polymorphism -based heritability has been estimated to be 10%. (7) Recent  
76 large-scale genome-wide association studies (GWAS) have identified multiple loci associated with  
77 alcohol consumption, underlining the importance of large study populations for unraveling the  
78 genetic architecture underlying alcohol-related traits. (7, 8) Similarly, GWAS of alcohol dependence  
79 and the Alcohol Use Disorders Identification Test (AUDIT) scores have shown the traits to be  
80 genetically distinct but positively correlated.(9,10)

81

82 Polygenic risk scores (PRS) derived from GWAS summary statistics have showcased improved  
83 performance in disease prediction. (11) PRSs for known risk factors have also been shown to  
84 associate with the related disease (12) and recently associations between multiple risk factor PRSs  
85 and related traits were confirmed and reported. (13, 14) However, the link between PRSs for  
86 behavioral traits and associated health outcomes remains poorly understood.

87

88 The assessment of potential health risks related to alcohol has so far relied on traditional risk factors,  
89 including family history, without explicit measurement of genetic risk. Here we developed a highly  
90 polygenic risk score for alcohol consumption and studied whether alcohol-related polygenic burden  
91 predicts alcohol-use disorders and other alcohol-related morbidity and mortality in Finnish biobank

92 cohorts (n=96,499) linked to electronic health records. Furthermore, we studied whether the PRS  
93 for alcohol consumption predicts alcohol-related outcomes beyond self-reported alcohol  
94 consumption and other related risk factors, thus providing more objective information independent  
95 of individual reporting bias or temporal fluctuations.

96

## 97 **Materials and methods**

98

### 99 **Study sample and definition of alcohol-related morbidity**

100 The data is comprised of 96,499 Finnish individuals from FinnGen Data Freeze 2, which includes  
101 prospective epidemiological and disease-based cohorts as well as hospital biobank samples  
102 (Supplementary Table 1). The data were linked by the unique national personal identification  
103 numbers to national hospital discharge, death, and medication reimbursement registries. Additional  
104 details and information on the genotyping and imputation are provided in the online-only  
105 Supplementary Information.

106

107 Alcohol-related baseline measures were available for a subset of the FinnGen dataset consisting of  
108 national population survey cohorts: FINRISK, collected in 1992, 1997, 2002, 2007 and 2012 and  
109 Health 2000, collected in 2000. The baseline data included self-reported information assessed by  
110 questionnaires, anthropometric measures, and blood samples. More detailed descriptions of the  
111 FINRISK and Health 2000 studies have been published previously.(15,16)

112

113 Additionally, three Finnish twin cohorts, FinnTwin12, NAG-FIN, and Old Twin were pooled and  
114 analyzed as one dataset. For these datasets, cohort baseline data was available, but the cohorts  
115 were not linked to electronic health records. For details regarding the twin datasets, see the online  
116 descriptions ( <https://wiki.helsinki.fi/display/twineng/Twinstudy> ). (17,18)

117

118 Using nationwide registries for deaths (1969-2016), hospital discharges (1969-2016), outpatient  
119 specialist appointments (1998-2016) and drug purchases (1995-2016), we combined 21 somatic and  
120 psychiatric alcohol-related diagnoses into a composite disease endpoint, harmonizing the  
121 International Classification of Diseases (ICD) revisions 8, 9 and 10, and ATC-codes (**Supplementary**  
122 **Table 1**). These registries spanning decades were electronically linked to the cohort baseline data

123 using the unique national personal identification numbers assigned to all Finnish citizens and  
124 residents.

125

## 126 **Genotyping and imputation**

127

128 FinnGen, FINRISK, Health2000, and Finnish Twin Cohort samples were genotyped with Illumina and  
129 Affymetrix genomewide SNP arrays. Individuals with non-European ancestry or uncertain sex were  
130 excluded. The details about the genotype calling, quality controls and imputation are provided in  
131 the Supplementary Information.

132

## 133 **Polygenic risk scores**

134

135 Summary statistics from the largest existing GWAS meta-analysis on alcohol consumption (8) were  
136 used for constructing the PRS. To avoid overfitting, a separate ad hoc meta-analysis was performed  
137 by GSCAN, excluding all Finnish and 23andMe samples (n=527,282 after exclusions). The LDpred-inf  
138 method (19) was used to account for linkage disequilibrium (LD) among loci, with whole-genome  
139 sequencing data on 2,690 Finns serving as the external LD reference panel. The final scores were  
140 generated with PLINK2 (20) by calculating the weighted sum of risk allele dosages for each variant.  
141 The number of variants in the final scores was  $1.1 \times 10^6$ .

142

## 143 **Statistical analysis**

144

145 The Cox proportional hazard model was used to estimate survival curves, hazard ratios (HRs) and  
146 95 % confidence interval (95% CI) in the survival analyses where age was used as the time scale. R's  
147 cox.zph function was used to test whether the proportional assumption criteria applied in our  
148 models. Linear regression in FINRISK and Health 2000 and linear mixed model in the Twin Cohort  
149 was used for estimating the relationship between the PRS and alcohol consumption. Logistic  
150 regression in the FINRISK and Health 2000 cohorts and linear mixed model in the Twin Cohort was  
151 used to estimate the relationship between alcohol abstinence and the PRS.

152

153 Age, sex, genotyping array, and the first ten principal components of ancestry were used as core  
154 covariates. Additionally, body mass was used as a covariate in the model estimating the PRS-alcohol

155 consumption relationship. Self-reported weekly average alcohol consumption from the past year  
156 (when unavailable, the past week's consumption) was used as the estimate for alcohol  
157 consumption. In the fully adjusted survival model analyses,  $\log(x+1)$  -transformed alcohol  
158 consumption-estimate, current smoking status, binary higher education status, binary  
159 marital/cohabitation status and GGT (Gamma Glutamyl Transferase) blood levels at baseline served  
160 as covariates.

161

162 In the survival analyses, all prevalent cases and individuals with covariate missingness were  
163 excluded. The PRS was normalized and included as a continuous variable in the models. In the  
164 survival analysis the highest and lowest genetic risk for alcohol consumption were compared using  
165 PRS quintiles.

166

167 In analyses using baseline consumption data, the analyses were performed separately in the Health  
168 2000, FINRISK Study, and Twin Cohorts and then meta-analyzed using fixed effects model.

169

170 In risk prediction, FINRISK cohorts with at least 10 years of follow-up (from 1992 to 2002) were used  
171 to train the model, and the predictive performance was tested in the Health 2000 cohort. The  
172 maximal follow-up window was restricted to 10 years. The change in the predictive performance  
173 was assessed by comparing models with and without the PRS using the correlated C-index approach  
174 (21) along with calculating the continuous reclassification improvement (NRI) (22) and integrated  
175 discrimination improvement (IDI).(23) The Hosmer-Lemeshow goodness-of-fit test was used to test  
176 model calibration.

177

## 178 **Patient and public involvement**

179

180 No patients were involved in setting the research question or the outcome measures, nor were they  
181 involved in developing plans for recruitment, design, or implementation of the study. No patients  
182 were asked to advise on interpretation or writing up of results. There are no plans to disseminate  
183 the results of the research to study participants or the relevant patient community.

184

185

186 **Results**

187

188 **Cohorts**

189 Our primary dataset (FinnGen) is comprised of 96,499 unrelated individuals (54,262 women) with a  
 190 total of 55,484,114 person-years of registry-based follow-up and 4,785 first-observed alcohol-  
 191 related major health events. Alcohol consumption estimates were available for a total of 39,695  
 192 individuals from the prospective cohorts (FINRISK, Health 2000 and Twin Cohort). Two cohorts,  
 193 FINRISK and Health 2000, have full registry data and information on self-reported alcohol  
 194 consumption and related baseline data and consist of 28,639 individuals (94.5% of the participants  
 195 after excluding 964 prevalent alcohol-related morbidity cases), with 424,053 person-years of  
 196 registry-based follow-up and 988 first ever alcohol-related events. The interview-based DSM-IV  
 197 AUD-status was available in a subset of the Twin cohort for 713 cases and 1460 controls.

198

199 **Table 1.** Population characteristics of FinnGen, FINRISK, Health 2000, and Twin Cohort -datasets.  
 200

|                                  | FinnGen                     | FINRISK            | Health 2000      | Twin Cohort      |
|----------------------------------|-----------------------------|--------------------|------------------|------------------|
| <b>N</b>                         | 96,499<br>(54,262<br>women) | 23,824<br>(12,513) | 5,945<br>(3,260) | 9,926<br>(5,036) |
| <b>N (incident events)</b>       | 4,785                       | 817                | 171              | NA               |
| <b>Age (years)</b>               | 57.5(end of follow-up)      | 48.6 (baseline)    | 54.0 (baseline)  | 49.3 (baseline)  |
| <b>Alcohol drinking (g/week)</b> | NA                          | 76.5               | 73.9             | 84.8             |
| <b>Non-drinkers</b>              | NA                          | 2,874(12%)         | 1,298 (22%)      | 30(0.3%)         |
| <b>Current smokers</b>           | NA                          | 5,929 (25%)        | 1,538 (26%)      | 3,478 (35%)      |
| <b>Higher education</b>          | NA                          | 8,612 (36%)        | 1,721 (28%)      | 1,192 (12%)      |
| <b>Marriage or co-habitation</b> | NA                          | 17,468 (73%)       | 4,151 (68%)      | 6,661 (67%)      |
| <b>GGT (U/I)</b>                 | NA                          | 33.8               | 36.6             | NA               |

201 **Alcohol consumption**

202

203 In a meta-analysis of the three cohorts with alcohol consumption estimates available (n=39,888),  
204 the PRS for alcohol consumption was strongly associated with self-reported alcohol consumption.  
205 A one SD increase in the PRS was associated with an 11.2 g (= 0.93 drinks á 12g) increase in weekly  
206 pure alcohol intake (beta=11.2 [9.85-12.6 g],  $p = 2.3 \cdot 10^{-58}$ ) (**Fig 1, cohort-specific figures in the**  
207 **supplementary material**). Adding the PRS to the model improved  $r^2$  by ~0.6 percentage points (from  
208 9.17 % to 9.80 %). In addition, the PRS was negatively associated with alcohol abstinence (reported  
209 alcohol consumption 0). In FINRISK and Health2000, a 1 SD increase in the PRS for alcohol  
210 consumption was associated with a 13.7% reduced likelihood of being a nondrinker (OR=0.863  
211 [0.833-0.895],  $p=6.1 \cdot 10^{-16}$ ) while this was not case in the Twin Cohort where there were only 30  
212 nondrinkers (OR=0.999[0.998-1.00]  $p=0.31$ ). Cohort-specific figures for sex-specific alcohol  
213 consumption are in the supplementary material.

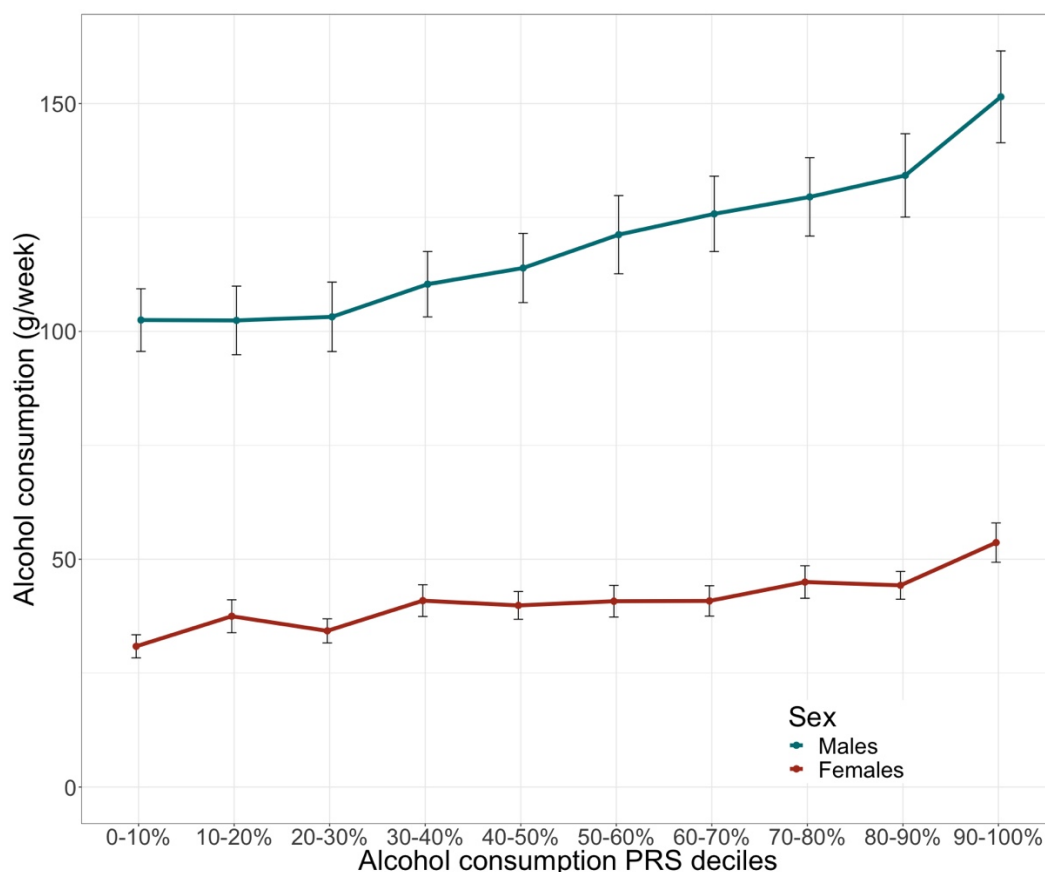

214

215

216 **Figure 1.** Alcohol drinking (g/week) for the deciles of the alcohol consumption polygenic risk score  
217 shown for males (n= 18,887) and females (n= 20,808) with 95% confidence interval error bars  
218 (n=39,695)



219

## 220 Alcohol-related morbidity

221 The PRS for alcohol consumption was strongly associated with increased risk for lifelong major  
222 alcohol-related events derived from electronic health-records in the FinnGen dataset (n=96,499,  
223 cases = 4,785) (**Figure 2**). The difference in the risk for alcohol-related morbidity events between  
224 the lowest and highest risk quintiles in the PRS was 67 % (HR=1.67 [1.52-1.84],  $p=3.2 \times 10^{-27}$ ) and a 1  
225 SD increase in the PRS was associated with a 21 % increase in risk (HR=1.21 [1.18-1.25],  $p=1.4 \times 10^{-40}$ ).  
226 The association was similar in both males (HR=1.21 [1.17-1.26],  $p=1.8 \times 10^{-28}$ ) and females  
227 (HR=1.22 [1.16-1.29],  $p=4.3 \times 10^{-14}$ ).

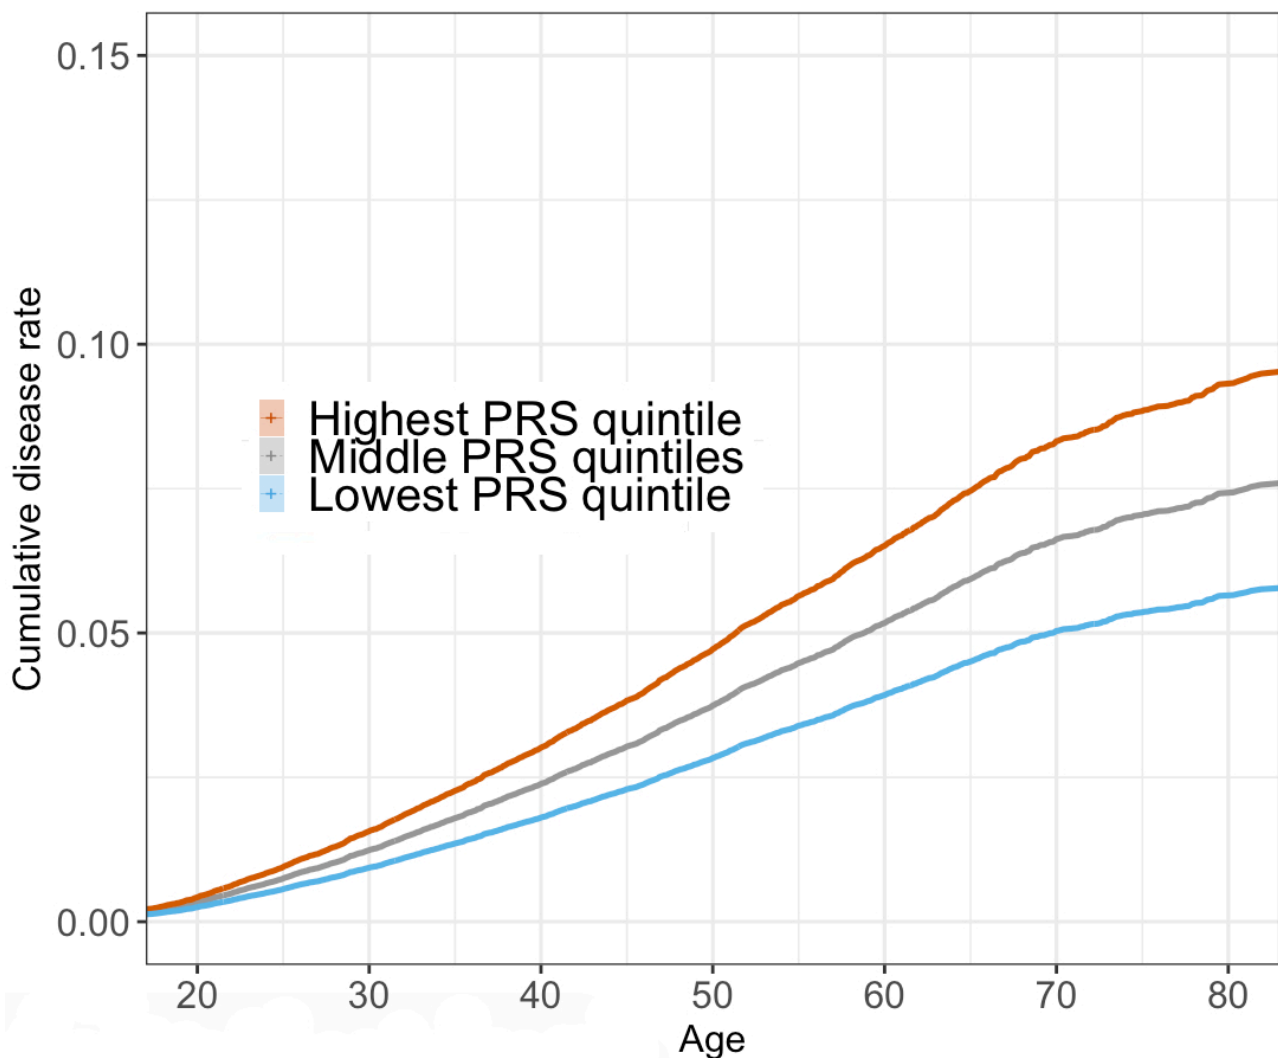

228

229 **Figure 2.** The FinnGen dataset was divided into three groups consisting of the lowest quintile, three  
230 middle quintiles and the highest quintile of the alcohol consumption PRS. The cumulative disease  
231 rate of alcohol-related morbidity is displayed as a function of age (n=96,499).

232 In the cohorts where alcohol consumption estimates and other related baseline data were available  
233 at the cohort entry time, the PRS was associated with an increased risk of incident major alcohol-  
234 related events and the association was maintained also in the fully adjusted model (n = 28,639,  
235 cases = 911). In a meta-analysis of the two cohorts 1 PRS SD was associated with a 26% increased  
236 risk of incident alcohol-related events when the consumption-estimate was not in the model  
237 (HR=1.26 [1.18-1.34],  $p=1.1*10^{-12}$ ) and with a 15 % increase when alcohol consumption was in the  
238 model (HR=1.15 [1.08-1.22],  $p=2.1*10^{-5}$ ). In a fully adjusted model, including marital status,  
239 education, smoking status and GGT, the estimate were unchanged (HR=1.15 [1.08-1.22],  $p=2.0*10^{-5}$ ) (Table 2).

241

## 242 **Mortality**

243

244 We observed a similar increase in the risk of alcohol-related and all-cause mortality. In FinnGen with  
245 7,249 deaths one SD increase in the PRS for alcohol consumption was associated with 7 % increase  
246 in the risk of death (HR= 1.07 [1.05-1.10],  $p = 4.3*10^{-9}$ ). The risk estimate between the highest and  
247 lowest 20 % in the PRS was 1.23 (HR = 1.23 [1.14-1.23],  $p = 1.22*10^{-8}$ ). In our prospective cohorts,  
248 with cause-of-death information available, 4,125 deaths were recorded (**Table 2**). For all-cause  
249 mortality there was 11 % increase in the risk of death per 1 PRS SD in the basic model (HR=1.11[1.07-  
250 1.14],  $p = 3.2*10^{-10}$ ) and 9 % in the fully adjusted model (HR = 1.09 [1.06-1.12],  $p=1.1*10^{-7}$ ). The risk  
251 difference between the highest and lowest quintiles of the PRS was 33 % (HR=1.33 [1.2-1.47],  
252  $p=4.5e-08$ ) in the fully adjusted model.

253

254 Of the 4,125 deaths 335 were known to be alcohol-related. Without alcohol consumption in the  
255 model, the increase in alcohol-related mortality was 26 % per 1 PRS SD (HR=1.26 [1.13-1.4],  
256  $p=3.7*10^{-5}$ ). When alcohol consumption was included in the model, the increase was 13 % (HR=1.13  
257 [1.01-1.26],  $p=0.027$ ) and in a model with all co-variates, 11 % (HR=1.11 [0.996-1.24],  $p=0.058$ )  
258 (**Table 2**). Similarly, the PRS was associated with a higher risk of death from other than alcohol-  
259 related causes (n=3,790) when fully adjusted for all covariates (HR=1.08 [1.05-1.12],  $p=1.4*10^{-6}$ ).

260

261

262

263 **Table 2.** Cohort specific and meta-analyzed associations between the alcohol consumption polygenic  
 264 risk score and alcohol-related **a)** morbidity and **b)** mortality. In the fully adjusted model age, sex,  
 265 alcohol consumption, smoking, education, marital status and GGT (U/l) were used as non-genetic  
 266 covariates.  
 267

|                                       | FINRISK                                         | Health 2000                       | Meta-analysis                                   |
|---------------------------------------|-------------------------------------------------|-----------------------------------|-------------------------------------------------|
| <b>a) Alcohol-related morbidity</b>   | <b>Cases=817</b>                                | <b>Cases=171</b>                  | <b>Cases=988</b>                                |
| <b>Basic model with age and sex</b>   | HR=1.25 [1.16-1.34],<br>p=5.9*10 <sup>-10</sup> | HR=1.32 [1.13-1.53],<br>p=0.00036 | HR=1.26 [1.18-1.34],<br>p=1.1*10 <sup>-12</sup> |
| <b>Model with alcohol consumption</b> | HR=1.13 [1.06-1.21],<br>p=0.00053               | HR=1.23 [1.06-1.43],<br>p=0.0081  | HR=1.15 [1.08-1.22],<br>p=2.1*10 <sup>-5</sup>  |
| <b>Fully adjusted model</b>           | HR=1.14 [1.06-1.22],<br>p=0.00027               | HR=1.20 [1.03-1.4],<br>p=0.022    | HR=1.15 [1.08-1.22],<br>p=2.0*10 <sup>-5</sup>  |
| <b>b) Alcohol-related mortality</b>   | <b>Deaths=264</b>                               | <b>Deaths=71</b>                  | <b>Deaths=335</b>                               |
| <b>Basic model with age and sex</b>   | HR=1.21 [1.07-1.37],<br>p=0.0022                | HR=1.41 [1.11-1.8],<br>p=0.0045   | HR=1.25 [1.12-1.4],<br>p=5.9*10 <sup>-5</sup>   |
| <b>Model with alcohol consumption</b> | HR=1.08 [0.952-1.22],<br>p=0.24                 | HR=1.34 [1.05-1.71],<br>p=0.017   | HR=1.13 [1.01-1.26],<br>p=0.033                 |
| <b>Fully adjusted model</b>           | HR=1.08 [0.957-1.23],<br>p=0.21                 | HR=1.22 [0.965-1.55],<br>p=0.096  | HR=1.11 [0.996-1.24],<br>p=0.058                |

268

269

## 270 DSM-IV Alcohol-use disorder

271 The PRS was also associated with an interview-based DSM-IV alcohol use disorder diagnosis in the  
 272 Nicotine Addiction Genetics Family cohort (440 cases, 1,140 controls) and a subset of FinnTwin16  
 273 cohort (273 cases, 320 controls). A meta-analysis of the two cohorts (713 cases) resulted in a  
 274 combined 20 % increase in the prevalence of AUD per 1 PRS SD (OR = 1.20 [1.11-1.31], p = 2.29\*10<sup>-5</sup>)  
 275 in the unadjusted model. Adjusting for marital status, education and smoking explained part of

276 the effect (OR=1.14 [1.02-1.28], p=0.023) and further adjusting with maximal amount of drinks  
277 taken explained most of the effect (OR=1.06 [0.94-1.19], p=0.35).

278

## 279 **Prediction**

280 The predictive performance of the PRS was evaluated in the Health 2000 cohort (5,732 complete  
281 cases, 110 events) with a follow-up-window of 10 years based on the Cox model trained in the  
282 FINRISK cohort (18427 complete cases with  $\geq 10$  years of follow-up, 628 events). In a model not  
283 including the alcohol consumption estimate, adding the PRS to the model increased the C-index by  
284 0.020, from 0.69 to 0.71 ( $p = 0.017$ ). Both IDI (0.00242 [0.00102-0.00383],  $p = 7.3 \times 10^{-4}$ ) and NRI  
285 (0.335 [0.146-0.523],  $p = 5.1 \times 10^{-3}$ ) shifts were positive and statistically significant. When the log-  
286 transformed alcohol consumption estimate was included, a modest improvement of prediction was  
287 observed (C-index=0.0022 from 0.812 to 0.814, p-value=0.30; NRI=0.308 [0.119-0.497],  $p = 0.0014$   
288 and IDI=0.00173 [0.000726-0.00305],  $p = 0.017$ ). Similarly, a modest gain was observed when adding  
289 PRS to a model with all available covariates including also marital status, education status, smoking  
290 status and GGT (C-index=0.00183 from 0.847 to 0.849,  $p=0.44$ ; NRI=0.235 [0.0461-0.423],  $p=0.015$ ;  
291 IDI =0.00331[0.0000254-0.00659],  $p = 0.048$ ).

292

## 293 **Discussion**

294 We developed a highly polygenic risk score for alcohol consumption by obtaining weights from a  
295 recently published large-scale discovery sample and showed that the PRS was strongly associated  
296 with alcohol consumption in independent biobank cohort samples. An increased polygenic burden  
297 for alcohol consumption was associated with higher incidence of major alcohol-induced health  
298 events. The associations remained significant when we accounted for self-reported alcohol  
299 consumption and other relevant covariates; in a fully adjusted model the relative risk-estimate  
300 between the highest and lowest quintiles of the polygenic risk score was 1.6. Furthermore, the PRS  
301 was also associated with both alcohol-related, non-alcohol related and all-cause mortality.

302

## 303 **Comparison with other studies**

304

305 Our PRS shows the utility of genetic information for prediction of alcohol-related harm. The PRS,  
306 developed from a genetic analysis of cross-sectional self-reported alcohol consumption, was

307 associated with future risk of major alcohol-related health events. While a large number of PRSs  
308 have already been established for various traits and diseases (11), the development of PRSs for  
309 behavioral traits, such as substance use, has until now been limited (24-27) and the studies have  
310 not assessed their impact on future major health events.

311

## 312 **Implications**

313

314 Our results show that using a large sample size with long follow-up, we were able to build a PRS of  
315 alcohol consumption that is associated not only with alcohol consumption in independent samples,  
316 but also with future incident alcohol-related health events. In line with the knowledge that alcohol  
317 consumption is a major contributor to the worldwide burden of death, especially among working-  
318 age adults (1), we found the PRS to be associated also with all-cause mortality, further highlighting  
319 the importance of alcohol drinking as a cause of premature death.

320

321 Our score provides a genetic basis for potentially identifying a subset of high-risk individuals even  
322 early on in life, with potential for more targeted prevention of AUDs and other alcohol-related  
323 morbidity. Prevention is a cost-effective and efficient strategy to reduce alcohol related harms (28)  
324 and it is labeled one of the United Nations main health-related worldwide strategies of sustainable  
325 development ( <https://sustainabledevelopment.un.org/sdg3> ). A higher genetic predisposition for  
326 alcohol-related harms was detected both in the presence and absence of alcohol consumption data,  
327 as our PRS predicted alcohol-related harms beyond self-reported alcohol consumption. Health  
328 services are encouraged to support initiatives for screening and brief interventions for harmful  
329 drinking (29) as an effective strategy for tackling alcohol-related harm.(30) Thus, genetic  
330 information could potentially be used to improve the arsenal of possible strategies to detect high-  
331 risk individuals for targets of brief interventions. The fact that individuals in the highest PRS quintile  
332 showed an elevated risk for alcohol-related health events even in fully adjusted models could justify  
333 the use of genetic information even in clinical settings where a detailed history of alcohol  
334 consumption estimates, AUDIT-scores, or similar information are attainable. Communicating the  
335 information of higher risk for alcohol-related harm to patients could serve as a motivator for  
336 reducing drinking or committing to abstinence. The effect of being aware of one's negative  
337 expectations could also be unwanted, as is thought to be the case in the stereotype threat  
338 phenomenon. (31-34)

339

340 Self-reported alcohol consumption is known to be biased and problematic in terms of reliability and  
341 validity for predicting alcohol-related risks (35,36). Some bias derives from true measurement error,  
342 but another source is the lifelong temporal fluctuation of alcohol-drinking patterns not captured by  
343 a measure at one single timepoint. Our PRS was associated with alcohol-related harms even when  
344 adjusting for self-reported alcohol consumption estimate. One potential reason for this is that the  
345 PRS contains information from the latent genetic predisposition for alcohol consumption, thus  
346 overriding both the true measurement error and temporal fluctuations in alcohol drinking volume.

347

348 It has been hypothesized that alcohol consumption-based genetic discovery might inform more  
349 about low-level drinking than about problematic drinking and AUDs.(37) However, we built a  
350 polygenic risk score for alcohol consumption and successfully used it to predict alcohol-related  
351 harms. Due to the robustness of a self-reported single timepoint alcohol consumption estimate and  
352 the fact that different alcohol-related traits are to some degree genetically distinct,(9,10) it is  
353 expected that a PRS developed directly for alcohol-related morbidity will outperform our PRS in  
354 predicting alcohol-related health burden. Supporting this assumption, the general pattern is that  
355 PRSs are more strongly associated with their respective diseases than with related phenotypes.  
356 (13,14) Unfortunately, no high-quality summary statistics for alcohol-related harms including both  
357 somatic and psychiatric outcomes yet exist; the performed GWAS have only covered alcohol  
358 dependence (10) and been far smaller in size than our discovery sample of choice, thus making  
359 future efforts for large-scale GWAS discovery based on alcohol-related harms more than necessary.

360

### 361 **Strengths and limitations**

362

363 Our polygenic risk score was derived using European ancestry discovery samples and tested in the  
364 Finnish population. Its applicability in other populations therefore needs further evaluation as the  
365 alcohol-related genetic mechanisms may vary between populations. However, it has to be noted  
366 that the PRS derived from a non-Finnish sample performed well in the Finnish dataset, even though  
367 Finns are somewhat genetically different from the rest of the Europeans (38).

368

369 Our design allowed us to study outcomes prospectively. Our registry-based follow-up captures  
370 alcohol-related outpatient and inpatient visits, withdrawal treatment prescription for alcoholism,

371 and deaths, thus covering major alcohol-related health events over several decades. Nonetheless,  
372 some of the milder cases of alcohol-related health problems could have gone undetected.

373

### 374 **Conclusions**

375

376 In conclusion, a polygenic risk score for alcohol consumption was associated with elevated risk for  
377 incident alcohol-related health events and all-cause mortality. These findings underline the  
378 importance of heritable factors driving alcohol-related behavior. A successful attempt to predict  
379 alcohol-related health outcomes with a polygenic risk score shows promise in possible future  
380 utilization of genetic information in risk estimation and prediction of alcohol-related harms.

381

382

383

384

385

386

387

388

389

390

391

392

393

394

395

396

## 397 **Footnotes**

398

## 399 **Contributors**

400 All authors contributed to the study concept and design, analysis and interpretation of the data, as  
401 well as to the critical revision of the manuscript for important intellectual content or additionally to  
402 data acquisition. GSCAN provided the GWAS summary statistics. TK, TP, NJM and JKa performed the  
403 statistical analyses with support from SRi, ASH, JKo and SRu. ASH connected the data to the  
404 registries. TK drafted the manuscript. The corresponding author attests that all listed authors meet  
405 authorship criteria and that no others meeting the criteria have been omitted.

406

## 407 **Funding**

408 SR was supported by the Academy of Finland Center of Excellence in Complex Disease Genetics  
409 (Grant No 312062), Academy of Finland (Grant No 285380), the Finnish Foundation for  
410 Cardiovascular Research, the Sigrid Juselius Foundation and University of Helsinki HiLIFE Fellow  
411 grant. The funding agencies had no role in the design and conduct of the study; collection, analysis,  
412 and interpretation of data; or the writing of the manuscript or the decision to submit it for  
413 publication. The FinnGen project is funded by two grants from Business Finland (HUS 4685/31/2016  
414 and UH 4386/31/2016) and nine industry partners (AbbVie, AstraZeneca, Biogen, Celgene,  
415 Genentech, GSK, Merck/MSD, Pfizer and Sanofi). The Finnish Twin Cohort Nicotine Addictions  
416 Genetics family study has been supported by NIH DA12854 to PAFM, genotyping in the twin cohort  
417 by Global Research Awards for Nicotine Dependence (GRAND) funded by Pfizer, Inc to JK and the  
418 Welcome Trust Sanger Institute, and the Finntwin16 study by NIH AA-12502, AA-00145, and AA-  
419 09203 to RJR. JKa has been supported by the Academy of Finland (grants 265240, 263278, 308248,  
420 312073). TK, JTR, SRu and PR were supported by the Doctoral Programme in Population Health,  
421 University of Helsinki. JTR was supported by the MD/PhD Program of the Faculty of Medicine,  
422 University of Helsinki.

423

## 424 **Ethical approval**

425 The study was approved by the Coordinating Ethical Committee of the Helsinki and Uusimaa  
426 Hospital District, reference numbers HUS/990/2017 (FinnGen), 246/13/03/00/15, 113/E3/2001 and  
427 HUS/1169/2016 (The Twin Cohort). The FINRISK and Health 2000 data are stored in the THL Biobank.



428 The transfer of the FINRISK and Health 2000 sample collections to the THL biobank has been  
429 approved by the Coordinating Ethics Committee of Helsinki University Hospital on 10<sup>th</sup> October 2014  
430 and by the Ministry of Social Affairs and Health on 9<sup>th</sup> March 2015. This study was conducted under  
431 the THL biobank permission BB2017\_64 (FINRISK and Health 2000). No additional ethical approval  
432 was needed for meta-analysing the results.

433

#### 434 **Competing financial interests**

435 All authors have completed the ICMJE uniform disclosure form at  
436 [http://www.icmje.org/coi\\_disclosure.pdf](http://www.icmje.org/coi_disclosure.pdf) (available on request from the corresponding author). AP  
437 reports that part of his salary is received from the FinnGen project that is partially funded by nine  
438 industry partners AbbVie, AstraZeneca, Biogen, Celgene, Genentech, GSK, Merck/MSD, Pfizer and  
439 Sanofi. JKa reports grants from Academy of Finland, grants from US-PHS NIH/NIDA, grants from US-  
440 PHS NIH/NIAAA, grants from Pfizer Inc/GRAND program grant, grants from EU FP7, during the  
441 conduct of the study. VS reports a conference trip and an honorarium for participating in an advisory  
442 board meeting from Novo Nordisk (unrelated to the present study) and a grant to his institute for  
443 research collaboration from Bayer (unrelated to the present study); no other relationships or  
444 activities that could appear to have influenced the submitted work.

445

#### 446 **Acknowledgements**

447 We would like to Lea Urpa for proofreading, and Sari Kivikko, Huei-Yi Shen and Ulla Tuomainen for  
448 management assistance. We thank all participants of the study cohorts for their generous  
449 participation.

450

451

452

453

454

455

456

457

## 458 References

459

- 460 (1) World Health Organization. Global status report on alcohol and health 2018. 2018.
- 461 (2) Vengeliene V, Bilbao A, Molander A, Spanagel R. Neuropharmacology of alcohol addiction. *Br J Pharmacol* 2008;154(2):299-315.
- 462 (3) Grant BF, Goldstein RB, Saha TD, Chou SP, Jung J, Zhang H, et al. Epidemiology of DSM-5 alcohol use disorder: results
- 463 from the National Epidemiologic Survey on Alcohol and Related Conditions III. *JAMA psychiatry* 2015;72(8):757-766.
- 464 (4) Wood AM, Kaptoge S, Butterworth AS, Willeit P, Warnakula S, Bolton T, et al. Risk thresholds for alcohol
- 465 consumption: combined analysis of individual-participant data for 599 912 current drinkers in 83 prospective studies.
- 466 *The Lancet* 2018;391(10129):1513-1523.
- 467 (5) Nutt DJ, King LA, Phillips LD. Drug harms in the UK: a multicriteria decision analysis. *The Lancet* 2010;376(9752):1558-
- 468 1565.
- 469 (6) Dick, DM, et al. The Genetics of Substance Use and Substance Use Disorders, in: Kim Y, Kim Y (editor). *Handbook of*
- 470 *behavior genetics*. Springer; 2009; pp 436
- 471 (7) Clarke T, Adams MJ, Davies G, Howard DM, Hall LS, Padmanabhan S, et al. Genome-wide association study of alcohol
- 472 consumption and genetic overlap with other health-related traits in UK Biobank (N= 112 117). *Mol Psychiatry*
- 473 2017;22(10):1376.
- 474 (8) Liu M, Jiang Y, Wedow R, Li Y, Brazel DM, Chen F, et al. Association studies of up to 1.2 million individuals yield new
- 475 insights into the genetic etiology of tobacco and alcohol use. *Nat Genet* 2019:1.
- 476 (9) Sanchez-Roige S, Palmer AA, Fontanillas P, Elson SL, 23andMe Research Team, Substance Use Disorder Working
- 477 Group of the Psychiatric Genomics Consortium, et al. Genome-wide association study meta-analysis of the Alcohol Use
- 478 Disorders Identification Test (AUDIT) in two population-based cohorts. *Am J Psychiatry* 2018;appi. ajp. 2018.18040369.
- 479 (10) Walters RK, Polimanti R, Johnson EC, McClintick JN, Adams MJ, Adkins AE, et al. Transancestral GWAS of alcohol
- 480 dependence reveals common genetic underpinnings with psychiatric disorders. *Nat Neurosci* 2018;21(12):1656.
- 481 (11) Khera AV, Chaffin M, Aragam KG, Haas ME, Roselli C, Choi SH, et al. Genome-wide polygenic scores for common
- 482 diseases identify individuals with risk equivalent to monogenic mutations. *Nat Genet* 2018;50(9):1219.
- 483 (12) Holmes MV, Asselbergs FW, Palmer TM, Drenos F, Lanktree MB, Nelson CP, et al. Mendelian randomization of blood
- 484 lipids for coronary heart disease. *Eur Heart J* 2014;36(9):539-550.
- 485 (13) Richardson TG, Harrison S, Hemani G, Smith GD. An atlas of polygenic risk score associations to highlight putative
- 486 causal relationships across the human phenome. *eLife* 2019;8:e43657.
- 487 (14) Khera AV, Chaffin M, Wade KH, Zahid S, Brancale J, Xia R, Distefano M, Senol-Cosar O, Haas ME, Bick A, Aragam KG.
- 488 Polygenic prediction of weight and obesity trajectories from birth to adulthood. *Cell*. 2019 Apr 18;177(3):587-96.
- 489 (15) Borodulin K, Vartiainen E, Peltonen M, Jousilahti P, Juolevi A, Laatikainen T, et al. Forty-year trends in cardiovascular
- 490 risk factors in Finland. *The European Journal of Public Health* 2014;25(3):539-546.
- 491 (16) Heistaro S. Methodology report: Health 2000 Survey. Helsinki: Publications of the National Health Institute 2008.
- 492 (17) Kaprio J. The Finnish twin cohort study: an update. *Twin Research and Human Genetics*. 2013 Feb;16(1):157-62.
- 493 (18) Kaprio J. Twin studies in Finland 2006. *Twin research and human genetics*. 2006 Dec;9(6):772-7.
- 494 (19) Vilhjálmsson BJ, Yang J, Finucane HK, Gusev A, Lindström S, Ripke S, et al. Modeling linkage disequilibrium increases
- 495 accuracy of polygenic risk scores. *The American Journal of Human Genetics* 2015;97(4):576-592.
- 496 (20) Chang CC, Chow CC, Tellier LC, Vattikuti S, Purcell SM, Lee JJ. Second-generation PLINK: rising to the challenge of
- 497 larger and richer datasets. *Gigascience* 2015;4(1):7.
- 498 (21) Antolini L, Nam B, D'Agostino RB. Inference on correlated discrimination measures in survival analysis: a
- 499 nonparametric approach. *Communications in statistics-Theory and Methods* 2004;33(9):2117-2135.
- 500 (22) Pencina MJ, D'Agostino Sr RB, D'Agostino Jr RB, Vasan RS. Evaluating the added predictive ability of a new marker:
- 501 from area under the ROC curve to reclassification and beyond. *Stat Med* 2008;27(2):157-172.
- 502 (23) Pencina MJ, D'Agostino Sr RB, Steyerberg EW. Extensions of net reclassification improvement calculations to
- 503 measure usefulness of new biomarkers. *Stat Med* 2011;30(1):11-21.
- 504 (24) Clarke T, Smith AH, Gelernter J, Kranzler HR, Farrer LA, Hall LS, et al. Polygenic risk for alcohol dependence associates
- 505 with alcohol consumption, cognitive function and social deprivation in a population-based cohort. *Addict Biol*
- 506 2016;21(2):469-480.
- 507 (25) Belsky DW, Moffitt TE, Baker TB, Biddle AK, Evans JP, Harrington H, et al. Polygenic risk and the developmental
- 508 progression to heavy, persistent smoking and nicotine dependence: evidence from a 4-decade longitudinal study. *JAMA*
- 509 *psychiatry* 2013;70(5):534-542.
- 510

- 511 (26) Vink JM, Hottenga JJ, de Geus EJ, Willemsen G, Neale MC, Furberg H, et al. Polygenic risk scores for smoking:  
512 predictors for alcohol and cannabis use? *Addiction* 2014;109(7):1141-1151.
- 513 (27) Marioni RE, Ritchie SJ, Joshi PK, Hagenaars SP, Okbay A, Fischer K, Adams MJ, Hill WD, Davies G, Nagy R, Amador C.  
514 Genetic variants linked to education predict longevity. *Proceedings of the National Academy of Sciences*. 2016 Nov  
515 22;113(47):13366-71.
- 516 (28) Spoth RL, Guyll M, Day SX. Universal family-focused interventions in alcohol-use disorder prevention: cost-  
517 effectiveness and cost-benefit analyses of two interventions. *J Stud Alcohol* 2002;63(2):219-228.
- 518 (29) World Health Organization. Global strategy to reduce the harmful use of alcohol. 2010.
- 519 (30) Vandenberg B. Tackling Harmful Alcohol Use: Economics and Public Health Policy FRANCO SASSI (Ed) Paris, France:  
520 OECD Publishing, 2015 ISBN: 978-92-64-18106-9 (pdf), 240 pp. Paperback and E-book. Available free online. *Drug Alcohol*  
521 *Rev* 2016;3(35):367-368.
- 522 (31) Aronson J, Burgess D, Phelan SM, Juarez L. Unhealthy interactions: The role of stereotype threat in health  
523 disparities. *Am J Public Health* 2013;103(1):50-56.
- 524 (32) Burgess DJ, Warren J, Phelan S, Dovidio J, Van Ryn M. Stereotype threat and health disparities: what medical  
525 educators and future physicians need to know. *Journal of general internal medicine* 2010;25(2):169-177.
- 526 (33) Steele CM, Aronson J. Stereotype threat and the intellectual test performance of African Americans. *J Pers Soc*  
527 *Psychol* 1995;69(5):797.
- 528 (34) Spencer SJ, Steele CM, Quinn DM. Stereotype threat and women's math performance. *J Exp Soc Psychol*  
529 1999;35(1):4-28.
- 530 (35) Gmel G, Rehm J. Measuring alcohol consumption. *Contemporary Drug Problems* 2004;31(3):467-540.
- 531 (36) Litten RZ, Allen JP. Measuring alcohol consumption: Psychosocial and biochemical methods. : Springer Science &  
532 Business Media; 2012.
- 533 (37) Edenberg HJ, Gelernter J, Agrawal A. Genetics of Alcoholism. *Curr Psychiatry Rep* 2019;21(4):26.
- 534 (38) Lek M, Karczewski KJ, Minikel EV, Samocha KE, Banks E, Fennell T, et al. Analysis of protein-coding genetic variation  
535 in 60,706 humans. *Nature* 2016;536(7616):285.
- 536
